# Supplementary material for: Generation of human induced pluripotent stem cell lines carrying heterozygous PLN mutation from dilated cardiomyopathy patients
Source: PubMed Central journal article supplement (PMC9681708; doi:10.1016/j.scr.2022.102855), 2022-07-11

# A Mycoplasma

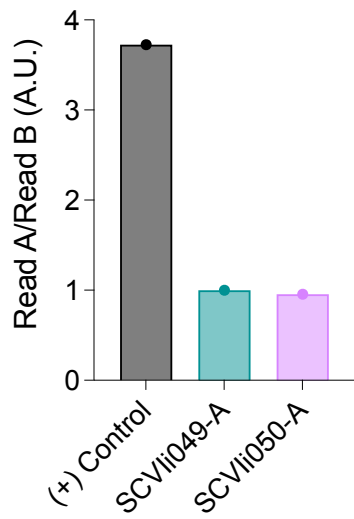

Supplement: NIHMS1827839-supplement-1.pdf [file NIHMS1827839-supplement-1.pdf]
